# Supplementary material
Source: PubMed Central journal article supplement (PMC3810981)
Supplement: NIHMS451872-supplement-1.pdf [file NIHMS451872-supplement-1.pdf]

## Supporting Information

### **Unveiling N-protonation and anion-binding effects on Fe/N/C-catalysts for O<sub>2</sub> reduction in PEM fuel cells**

Juan Herranz <sup>a</sup>, Frédéric Jaouen <sup>a,\*</sup>, Michel Lefèvre <sup>a</sup>, Ulrike I. Kramm <sup>a,b</sup>, Eric Proietti <sup>a</sup>, Jean-Pol Dodelet <sup>a</sup>, Peter Bogdanoff <sup>b</sup>, Sebastian Fiechter <sup>b</sup>, Irmgard Abs-Wurmbach <sup>c</sup>, Patrick Bertrand <sup>d</sup>, Thomas M. Arruda <sup>e</sup>, Sanjeev Mukerjee <sup>e</sup>

<sup>a</sup> Institut National de la Recherche Scientifique, Énergie, Matériaux et Télécommunications, Varennes, Québec, J3X 1S2, Canada.

<sup>b</sup> Helmholtz-Zentrum Berlin für Materialien und Energie

Lise-Meitner-Campus, Institute for solar fuels and energy storage (E-I-6)

Hahn-Meitner-Platz 1, D-14109, Berlin, Germany

<sup>c</sup> Technical University Berlin, Faculty VI, Ackerstrasse 76, D-13355, Berlin, Germany

<sup>d</sup> Université Catholique de Louvain, Institut de la matière condensée et des nanosciences

Croix-du-sud 1, 1348 Louvain-la-neuve, Belgium

<sup>e</sup> Northeastern University, Department of Chemistry and Chemical Biology, Boston, MA-02115, U.S.A

## Supporting figures

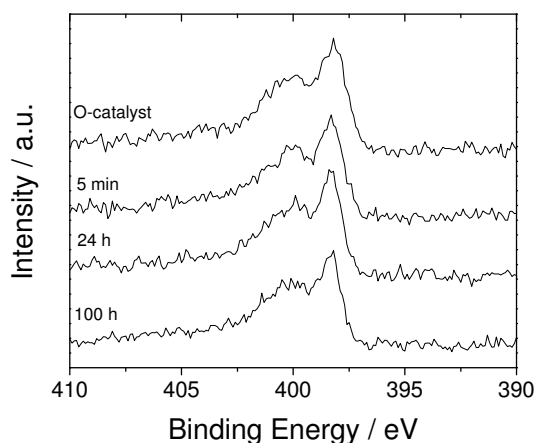

**Figure S1A.  $N_{1s}$  XPS-spectra of the original and acid-washed catalysts for various immersion times in a pH 1  $H_2SO_4$  solution**

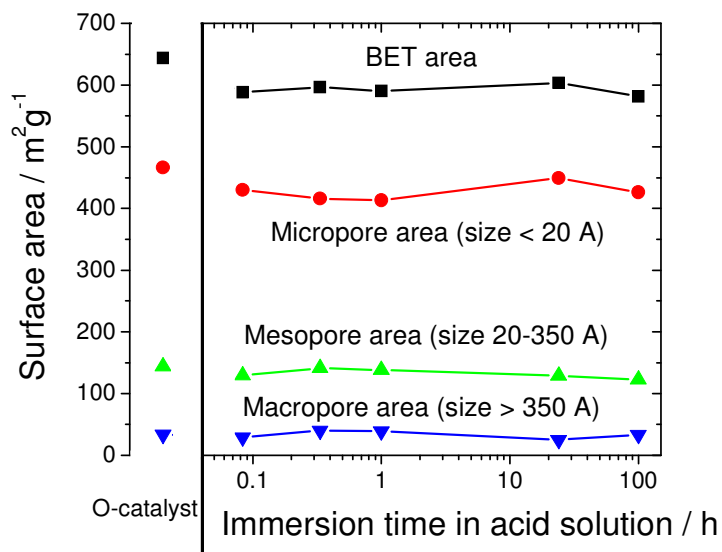

**Figure S1B. Surface areas of acid-washed catalysts vs. immersion time in a pH 1  $H_2SO_4$ -solution**

The surface areas were estimated from the BET equation and from the fitting of the  $N_2$ -adsorption isotherms obtained using Autosorb-1 surface area analyzer from Quantachrome instruments, with the Quenched Solid Density Functional Theory (slit-pore geometry) available in the ASWin software.

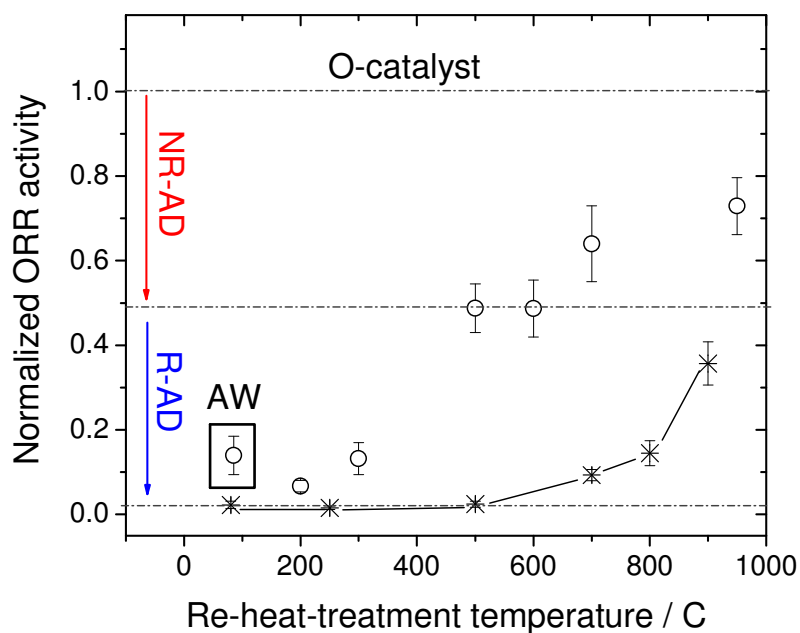

**Figure S2. Activity recovery by re-heat-treatment in Ar of catalysts acid-washed in 0.1 M HClO<sub>4</sub>**

Normalized activity based on that of the original catalyst (O-catalyst) vs. re-heat-treatment temperature in argon, as measured in RDE (open circles, electrolyte pH 1 H<sub>2</sub>SO<sub>4</sub>-solution).

The acid-washing was performed in a pH 1 HClO<sub>4</sub>-solution for 24 h, then the powder was filtered, rinsed and dried at 85°C overnight in air. Several aliquots of the acid-washed catalyst (AW-catalyst) were re-heat-treated in argon at various temperatures for 1 h. The initial activity of the O-catalyst was 2.3 A g<sup>-1</sup> in RDE. Several aliquots of a test precursor initially free of active sites (see Methods) were heat-treated in argon at various temperatures for 1 h (asterisks) in order to determine the minimum temperature required for catalytic-site formation.

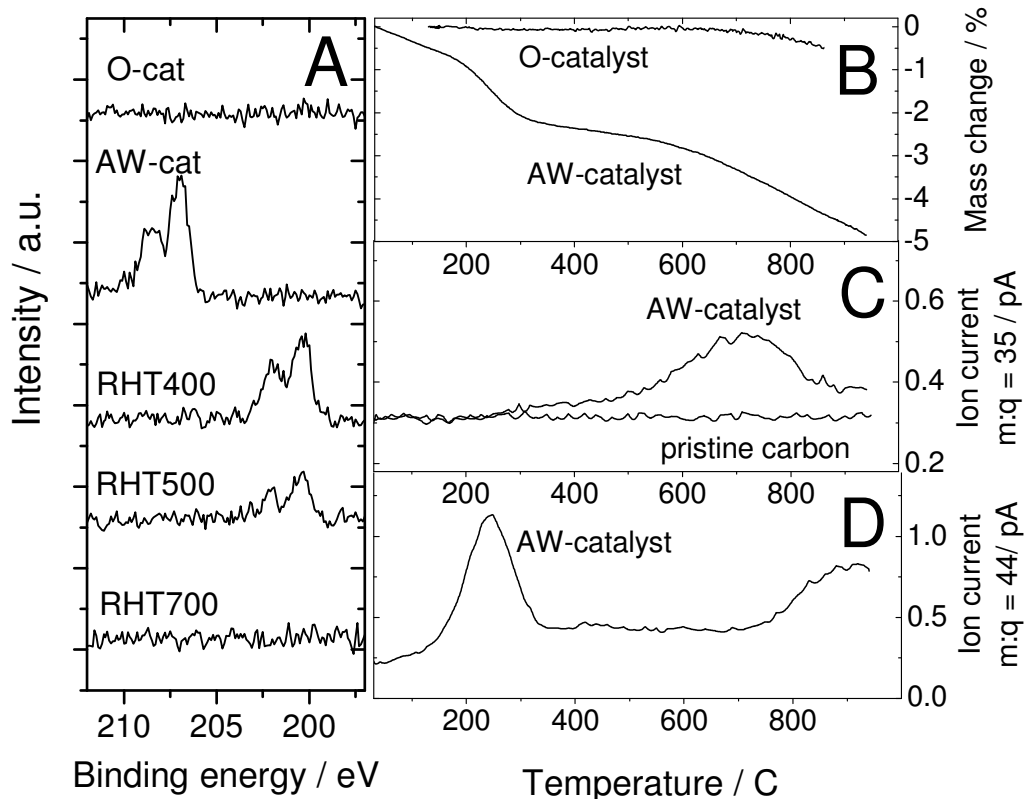

**Figure S3. Identification of surface species linked to activity decay upon acid washing in 0.1 M HClO<sub>4</sub>**

(A) X-ray photo-electron spectra of Cl<sub>2p</sub> for the original catalyst (O-cat), acid-washed catalyst (AW-cat) and aliquots of the latter re-heat-treated in argon for 1 h at 400, 500 or 700°C (RHT400, RHT500 and RHT700, respectively).

(B) Thermogravimetry using a heating rate of 10 K min<sup>-1</sup> and under argon flow of the O-catalyst and AW-catalyst.

(C-D) Ion mass-spectrometry for m:q = 35 (assigned to Cl) and m:q = 44 (assigned to CO<sub>2</sub>) that was acquired simultaneously with the thermogravimetry shown in (B).

## Modeling the Boehm titration experiment

This section explains how the modeling curve of Fig.8(B) was calculated and demonstrates the equations shown in Fig.8(B); equations that were used to extract from the experimental curve the values for pK<sub>a</sub> and B<sub>0</sub>. The concentration B<sub>0</sub> is defined as the total number of moles of basic groups, originating from the catalyst-surface, per volume of solution. The initial solution (before addition of an aliquot of the original catalyst) was a dilute solution of either H<sub>2</sub>SO<sub>4</sub> or NaOH.

The volumetric concentration B<sub>0</sub> is related to the concentration of surface groups per mass of catalyst (M<sub>0</sub>, in mol g<sup>-1</sup>) by the following relation

$$B_0 = M_0 \cdot m/v \quad [1]$$

Where m and v are the mass of original catalyst and the volume of initial solution, respectively.

The initial pH (before addition of mass m of catalyst) is pH<sub>i</sub> while the final pH, after addition of mass m of catalyst and equilibration, is pH<sub>f</sub>.

Analytical solutions were found when the problem was analyzed, on one hand, for low pH<sub>f</sub>-values and, on the other hand, for high pH<sub>f</sub>-values. The two analytical branches form the whole curve that is shown in Fig.8(B).

### Case A: low pH<sub>f</sub>-values

The basic groups on the catalyst surface are assumed to bind protons according to the reaction  $B + H^+ \leftrightarrow BH^+$ .

Accordingly, the initial and final concentrations of reactants and products are

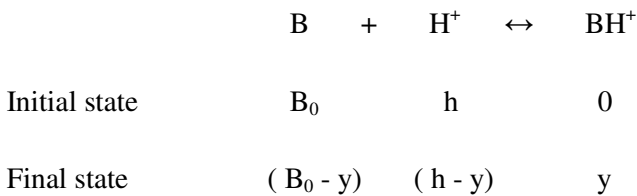

At equilibrium, one has

$$K_a = (B_0 - y) \cdot (h - y)/y \quad [2]$$

where K<sub>a</sub> is the acidity constant of BH<sup>+</sup>, the conjugate acid of the base B.

The final pH value is  $\text{pH}_f = -\log(h-y)$ . The value  $h$  is known because the initial pH is known. Therefore, the goal is to calculate  $y$  from known values of  $B_0$ ,  $h$  and  $K_a$ . Equation [2] is re-written in the form of a second order equation for  $y$ :

$$y^2 - y \cdot (h + K_a + B_0) + B_0 \cdot h = 0 \quad [3]$$

The positive root of this equation is

$$y = [ (h + K_a + B_0) - \sqrt{\Delta} ] / 2 \quad \text{with} \quad \Delta = (h + K_a + B_0)^2 - 4 \cdot B_0 \cdot h \quad [4]$$

Equation 4 is used to draw the first branch of the calculated curve  $\text{pH}_f$  vs.  $\text{pH}_i$ .

### Case B: high $\text{pH}_i$ -values

At  $\text{pH}_i$ -values around 7 (5 to 9), a buffering effect induced by water dissociation is not negligible in the calculation of the final pH. Two reactions need to be considered:  $B + H^+ \leftrightarrow BH^+$  and  $H_2O \leftrightarrow H^+ + OH^-$ . Accordingly, the initial and final concentrations of reactants and products are

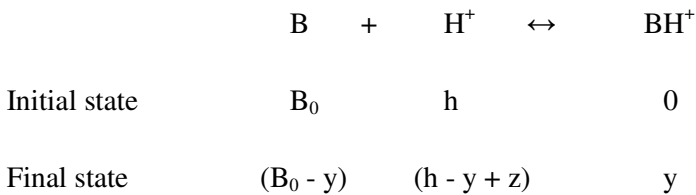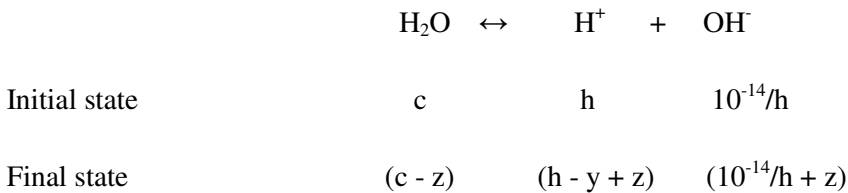

In the above, the initial concentration of  $OH^-$  was directly calculated from the initial concentration of  $H^+$ , using the dissociation constant for water,  $10^{-14}$ . The final pH value is  $\text{pH}_f = -\log(h-y+z)$ . Therefore, the goal is to calculate  $y$  and  $z$  from known values of  $B_0$ ,  $h$ ,  $c$  and  $K_a$ .

Two equations must be verified at equilibrium (final state):

$$K_a = (B_0 - y) \cdot (h-y+z)/y \quad [5]$$

$$10^{-14} = (h-y+z) \cdot (10^{-14}/h + z) \quad [6]$$

This is a non-linear system of two equations with two unknowns and can only be solved numerically, in the general case.

However, it simplifies when  $y \ll B_0$ . This corresponds to a case where a very small fraction of basic groups B become protonated. This assumption will always be valid above a certain value of  $\text{pH}_i$ , i.e. when the initial concentration of  $\text{H}^+$  is far lower than that of basic groups,  $B_0$ .

Case B, with  $y \ll B_0$ :

Equation 5 simplifies to

$$y = B_0 \cdot (h+z)/(K_a+B_0) \quad [7]$$

Then, the unknown y in Eq.6 is replaced by Eq.7, leading after rearrangement to the following second order equation for the unknown z.

$$z^2 + z \cdot (h + 10^{-14}/h) - (10^{-14} \cdot B_0/K_a) = 0 \quad [8]$$

The positive root of this equation is

$$z = [ \sqrt{\Delta} - (h + 10^{-14}/h) ]/2 \quad \text{with } \Delta = (h + 10^{-14}/h)^2 + 4 \cdot 10^{-14} \cdot B_0/K_a \quad [9]$$

Equation 9 is used to draw the second branch of the calculated curve  $\text{pH}_f$  vs.  $\text{pH}_i$ .

Simple estimation of  $B_0$  and  $K_a$  values from an experimental curve  $\text{pH}_f$  vs.  $\text{pH}_i$

At low pH, it is mathematically verified that at equivalence ( $h = B_0$ ), the calculated curve  $\text{pH}_f$  vs.  $\text{pH}_i$  shows an inflection point (see Fig.8B, solid line). Thus, the inflection point seen at low pH on an experimental curve of  $\text{pH}_f$  vs.  $\text{pH}_i$  can be used to estimate the value of  $B_0$ . The value of initial pH for which the inflection point is obtained is

$$\text{pH}_{i, \text{inflection}} = -\log(h) = -\log(B_0) \quad [10]$$

Then, to estimate the  $K_a$ -value (or rather, the  $\text{p}K_a$  value), an analytical expression was found for the plateau of final pH observed at medium values of initial pH (6 to 8).

The existence of this plateau is predicted by calculations only when  $K_a \ll B_0$ .

Case B, with  $y \ll B_0$  and  $K_a \ll B_0$

Then, we have  $B_0/K_a \gg 1$ , and one can assume that  $4 \cdot 10^{-14} \cdot B_0/K_a \gg (h + 10^{-14}/h)^2$ , and also that  $(4 \cdot 10^{-14} \cdot B_0/K_a)^{1/2} \gg (h + 10^{-14}/h)$ . Accordingly, Eq.9 simplifies to

$$z = [ (4 \cdot 10^{-14} \cdot B_0/K_a)^{1/2} ] / 2 = 10^{-7} \cdot B_0/K_a \quad [11]$$

This simplified expression for z is combined with Eq.7 to give the expression of y:

$$y = [ h + 10^{-7} \cdot (B_0/K_a)^{1/2} ] \cdot B_0 / (K_a + B_0) \quad [12]$$

Furthermore, due to the assumption  $K_a \ll B_0$ , one can also approximate  $B_0/(K_a+B_0)$  in Eq.12 with  $1 - K_a/B_0$  (Taylor development of the function  $1/(1+x)$  at small x-values). Thus, the expression of y further simplifies to

$$y = [ h + 10^{-7} \cdot (B_0/K_a)^{1/2} ] \cdot (1 - K_a/B_0) \quad [13]$$

The concentration of protons at equilibrium is  $(h - y + z)$ . Using Eqs. 11 and 13, one finds

$$h - y + z = K_a \cdot h/B_0 + 10^{-7} \cdot (K_a/B_0)^{1/2} \quad [14]$$

If a plateau for the final pH is calculated, it necessarily means that the value for the plateau is independent of the initial pH, i.e. independent of h. Thus, the term  $K_a \cdot h/B_0$  must be negligible compared to  $10^{-7} \cdot (K_a/B_0)^{1/2}$ . This is indeed verified because the plateau always appears in calculated curves at neutral or slightly alkaline pH, and also because the plateau is observed only if  $K_a \ll B_0$  (i.e.  $K_a/B_0 \ll (K_a/B_0)^{1/2}$ ). Thus, the plateau for the final pH is

$$\text{pH}_{f, \text{plateau}} = -\log(h-y+z) = -\log[ 10^{-7} \cdot (K_a/B_0)^{1/2} ] = 7 + 0.5 \log B_0 + 0.5 \text{p}K_a \quad [15]$$

Since the value of  $B_0$  can be estimated from experimental data at the inflection point seen at low initial pH, the experimental plateau of final pH observed near neutral initial pH-values can be used in combination with the above equation to estimate an average  $\text{p}K_a$ -value of the basic functionalities present on the catalyst.

If no plateau is experimentally observed, it means that the assumption  $K_a \ll B_0$  is not true. In that case, the  $\text{p}K_a$  value is best estimated by fitting the whole experimental curve with calculated curves obtained for different values of  $K_a$ , until the fit becomes satisfactory.
